# Supplementary material
Source: PubMed Central journal article supplement (PMC4269303)

**Intrinsic Transient Tracheal Occlusion Training and Myogenic Remodeling  
of Rodent Parasternal Intercostal Fibers**

Online Supplement

**Figure S1. Hematoxylin and eosin images from parasternals of animals exposed to 10 days of ITTO.** Connective tissue (white arrowheads) and remodeled cells were infrequent. Remodeling included small fibers (black arrowheads), centrally-nucleated fibers (white arrows), and rare instances of inflamed or necrotic fibers (black arrows).

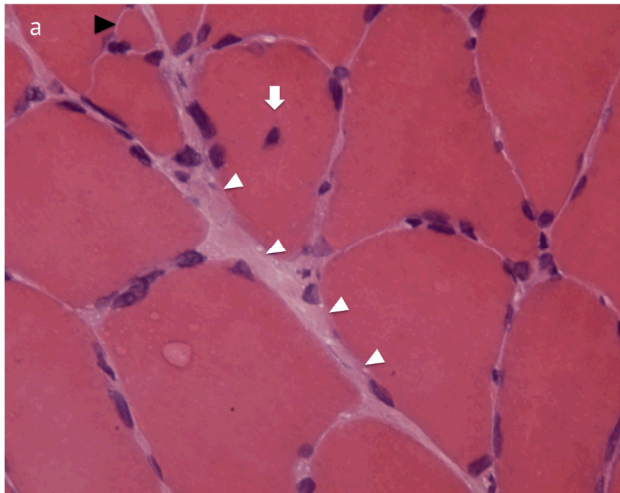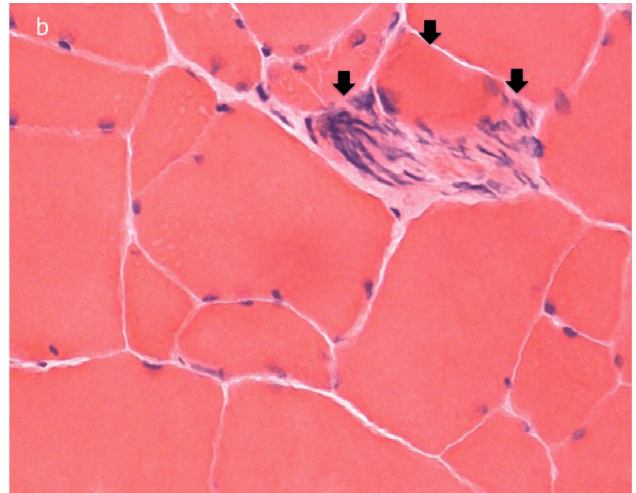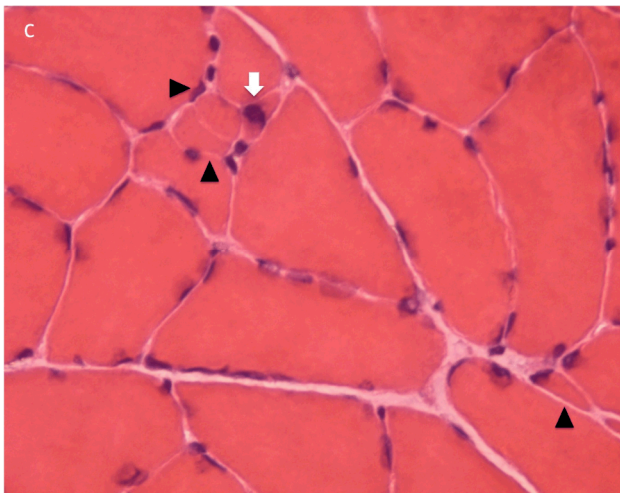

**Figure S2. Immunofluorescent image of Pax7 in the third parasternal intercostals.** Separate images of (a.) laminin, (b.) Pax7, and (c.) DAPI were overlaid to create (d.) a composite image (arrows: Pax7-positive nuclei, shown at 40X magnification). Scale bar = 50  $\mu\text{m}$ .

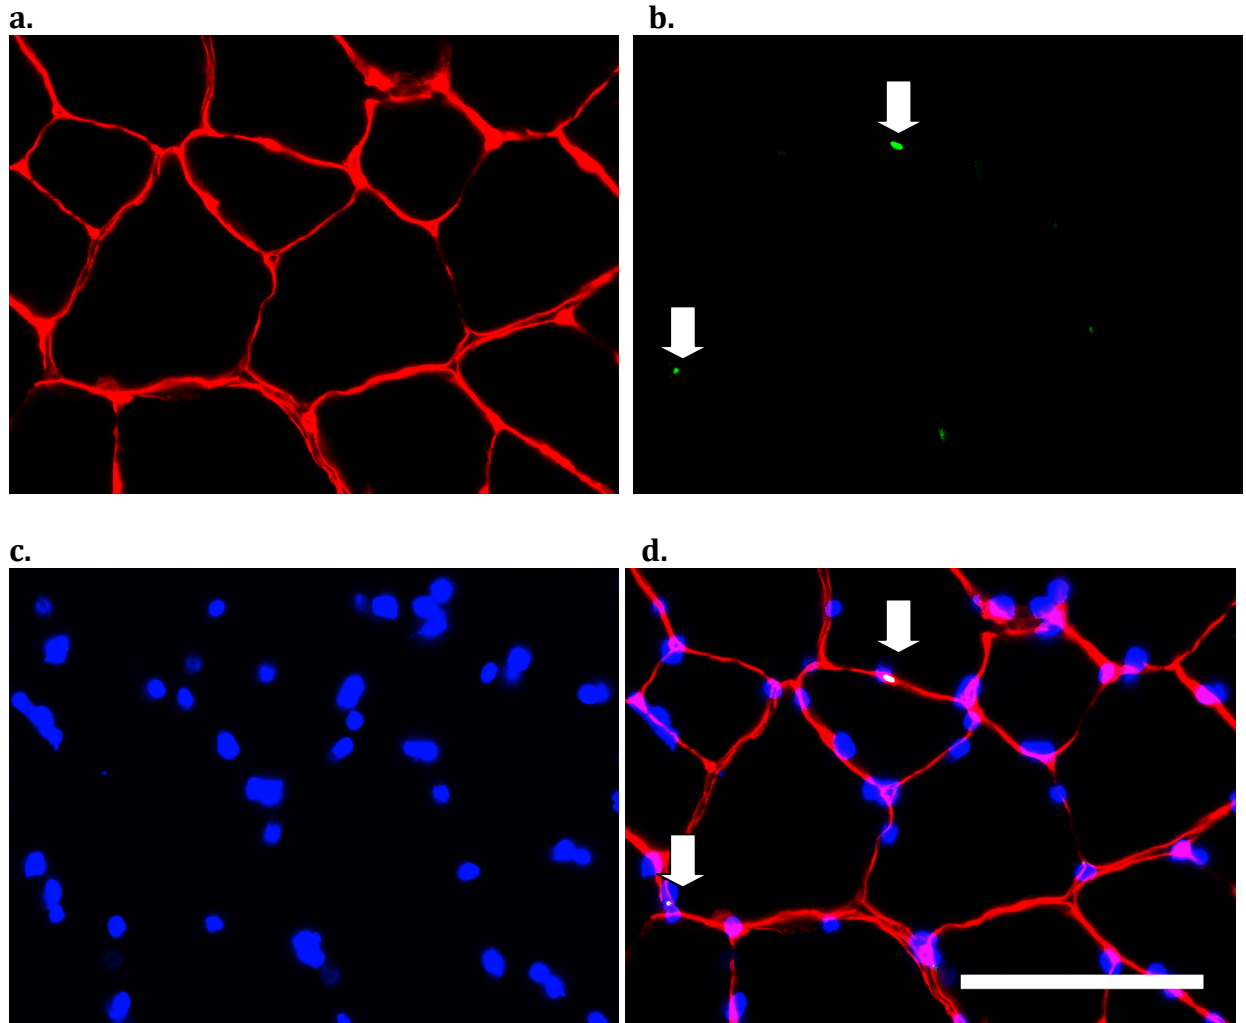

**Figure S3. Immunofluorescent image of embryonic myosin in the third parasternal intercostals.** Images of (a.) laminin, (b.) F1.625 antibody for eMHC, and (c.) DAPI were combined to create a (d.) composite image, shown at 20X. Scale bar = 100  $\mu\text{m}$ .

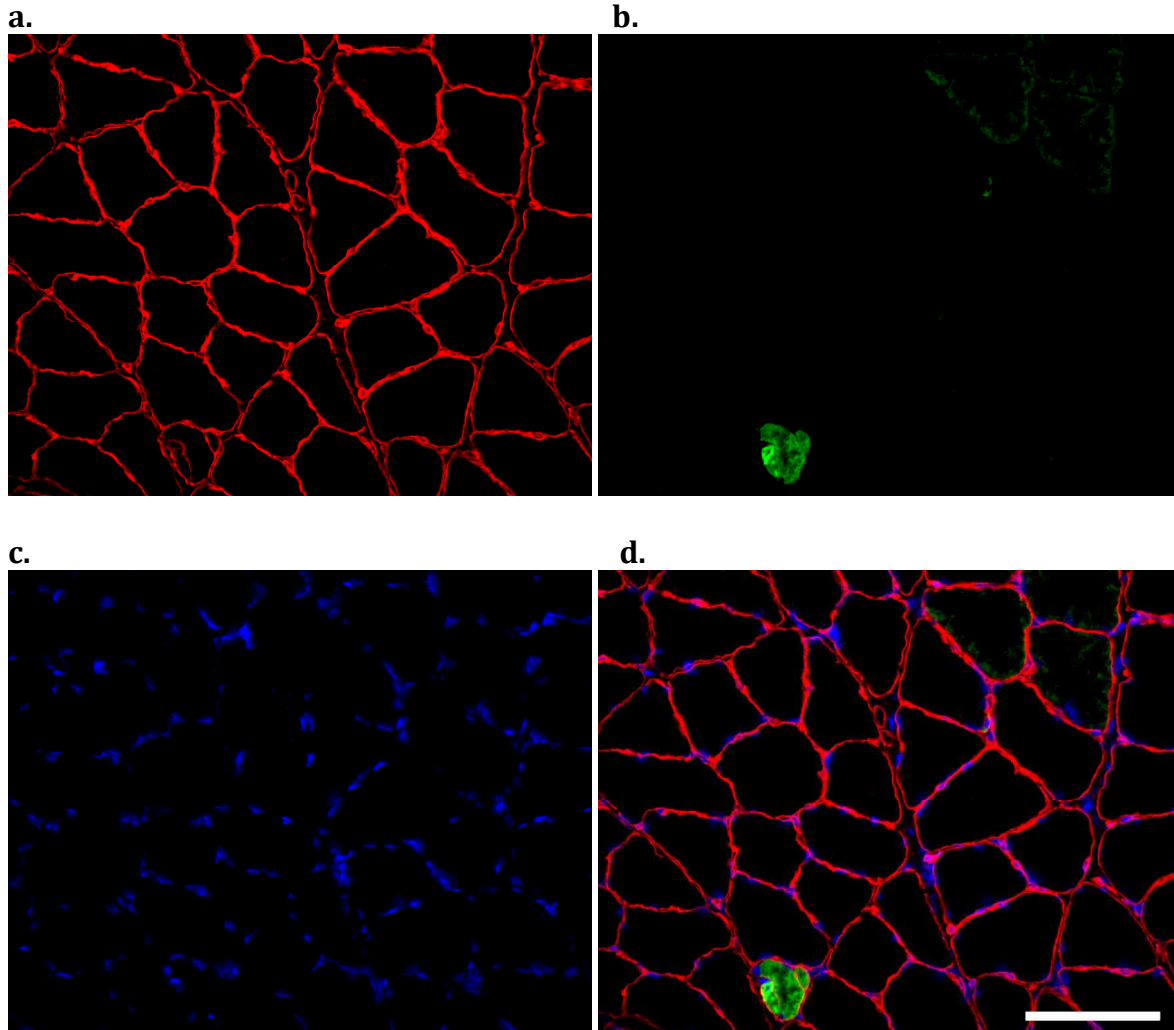

Supplement: NIHMS609652-supplement-01.pdf [file NIHMS609652-supplement-01.pdf]
